# Supplementary material
Source: PubMed Central journal article supplement (PMC5154459)
Supplement: SD6.pdf [file SD6.pdf]

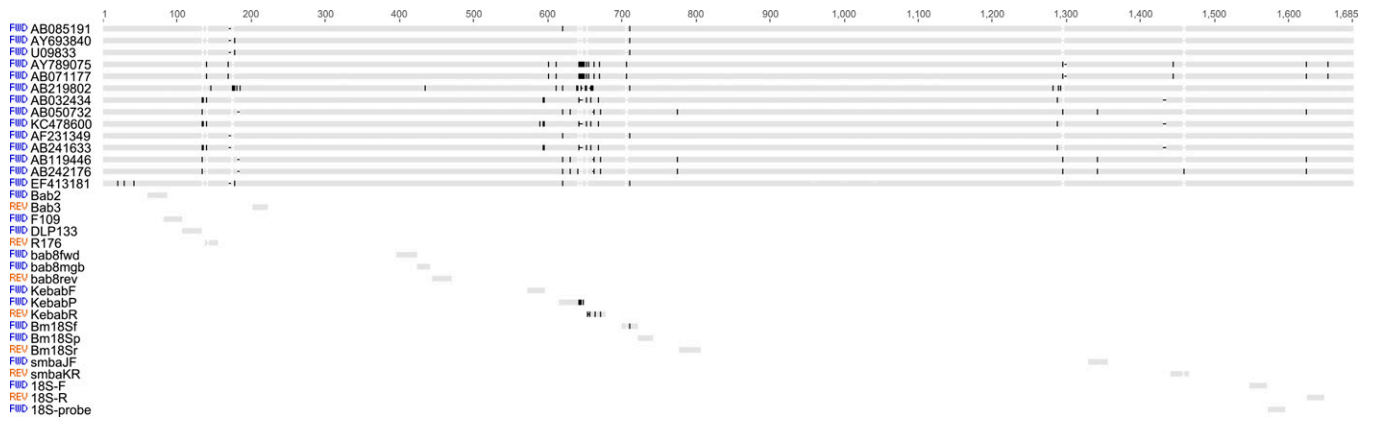

SUPPLEMENTAL FIGURE 1. Sequence alignment of partial 18S rRNA sequences (labeled with their GenBank accession numbers) and oligonucleotides from the seven real-time PCR assays targeting the 18S rRNA gene that were included in this study. Vertical lines indicate point mutations and horizontal lines indicate gaps. References: Bab2/Bab3—Bloch and others; F109/DLP133/R176—Tonnetti and others; bab8fwd/bab8mgb/bab8rev—Teal and others; KebabF/KebabP/KebabR—Bown and others; Bm18Sf/Bm18Sp/Bm18Sr—Rollend and others; smbaJK/smbaKR—Hersh and others; 18S-F/18S-probe/18S-R—Hojgaard and others.
